# Supplementary material
Source: Springer Nature journal article supplement (https://www.springermedizin.de/resource/supplementary/12887_2005_91_MOESM2_ESM.pdf/9477246)

| Author                                | Child Risk % | RR (95%CI)       | Adult Risk % | RR (95%CI)       |
|---------------------------------------|--------------|------------------|--------------|------------------|
| <b>Infections (Age 18 yrs cutoff)</b> |              |                  |              |                  |
| Medeiros*                             | 4            | 1.66 [0.28,9.70] | 39           | 0.27 [0.01,5.02] |
| Del Mar*,**                           | 0.3          | 0.20 [0.01,4.18] | 3            | 0.27 [0.11,0.65] |
| Arroll                                | 5            | 1.33 [0.57,3.11] | 33           | 0.77 [0.54,1.09] |
| Sirinavin                             | 50           | 0.58 [0.26,1.28] | 14           | 1.75 [0.42,7.21] |
| Andersen**                            | 7            | 0.37 [0.15,0.96] | 43           | 0.39 [0.05,2.83] |
| Smucny                                | 41           | 0.89 [0.47,1.68] | 75           | 0.86 [0.63,1.18] |
| Alejandria**                          | 29           | 0.71 [0.50,1.00] | 41           | 0.91 [0.85,0.98] |
| <b>Infections (Age 14 yrs cutoff)</b> |              |                  |              |                  |
| Arroll                                | 5            | 1.33 [0.57,3.11] | 50           | 0.76 [0.52,1.11] |
| Andersen**                            | 7            | 0.37 [0.15,0.96] | 52           | 0.53 [0.39,0.71] |
| Alejandria**                          | 29           | 0.71 [0.50,1.00] | 41           | 0.92 [0.86,0.98] |
| <b>Epilepsy (Age 18 yrs cutoff)</b>   |              |                  |              |                  |
| Ramaratnam†,**                        | 84           | 0.69 [0.57,0.83] | 88           | 0.88 [0.79,0.97] |
| Jette†,**                             | 80           | 0.76 [0.57,1.01] | 85           | 0.65 [0.59,0.71] |
| Taylor*                               | 32           | 2.49 [1.51,4.11] | 44           | 1.15 [0.91,1.45] |
| <b>Epilepsy (Age 14 yrs cutoff)</b>   |              |                  |              |                  |
| Marson A                              | 32           | 1.04 [0.75,1.44] | 36           | 0.89 [0.46,1.70] |
| Marson B†,**                          | 84           | 0.94 [0.84,1.07] | 90           | 0.89 [0.82,0.95] |
| Ramaratnam†,**                        | 84           | 0.69 [0.57,0.83] | 89           | 0.91 [0.85,0.96] |
| Castillo*,†,**                        | 78           | 0.77 [0.65,0.90] | 87           | 0.69 [0.64,0.76] |
| Taylor*                               | 32           | 2.49 [1.51,4.11] | 34           | 1.43 [0.83,2.47] |
| Tudur Smith                           | 36           | 0.90 [0.51,1.59] | 31           | 0.59 [0.14,2.52] |

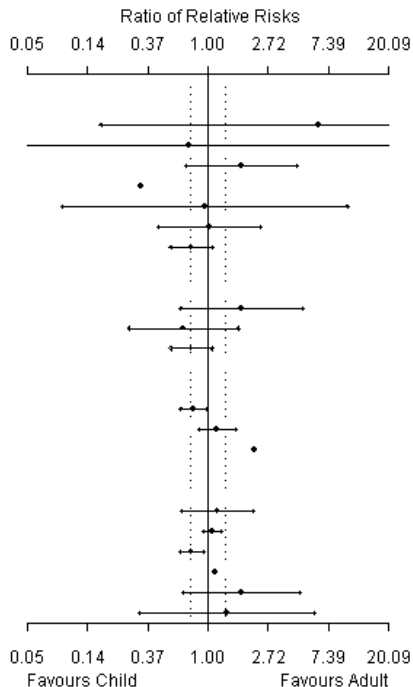

Supplement: MOESM2 [file 9477246]
